# Supplementary material for: Pleiotropic Effects of Bitter Taste Receptors on [Ca2+]i Mobilization, Hyperpolarization, and Relaxation of Human Airway Smooth Muscle Cells
Source: PubMed Central journal article supplement (PMC4485472; doi:10.1371/journal.pone.0131582), 2015-06-29
Supplement: pone.0131582.s001.pdf [file pone.0131582.s001.pdf]

**Table S1 EC<sub>50</sub> Values of TAS2R Agonists for Stimulating [Ca<sup>2+</sup>]<sub>i</sub> in HASM Cells.**

---

| Compound          | EC50 (μM) mean ± SE |
|-------------------|---------------------|
| aristolochic Acid | 333.1 ± 29.8        |
| chloroquine       | 452.8 ± 66.0        |
| diphenhydramine   | 185.5 ± 78.3        |
| flufenamic Acid   | 137.6 ± 76.3        |
| quinine           | 666.7 ± 42.9        |
| saccharin         | 558.2 ± 62.3        |
| strychnine        | >2mM                |
| yohimbine         | >2mM                |

---

Results are from at least four experiments, except for strychnine (n=2).
